# Supplementary material for: Neddylation pathway is up-regulated in human intrahepatic cholangiocarcinoma and serves as a potential therapeutic target
Source: PubMed Central journal article supplement (PMC4202163; doi:10.18632/oncotarget.2309), 2014-08-04
Supplement: oncotarget-05-7820-s001.pdf [file oncotarget-05-7820-s001.pdf]

## Neddylation pathway is up-regulated in human intrahepatic cholangiocarcinoma and serves as a potential therapeutic target

### Supplementary Material

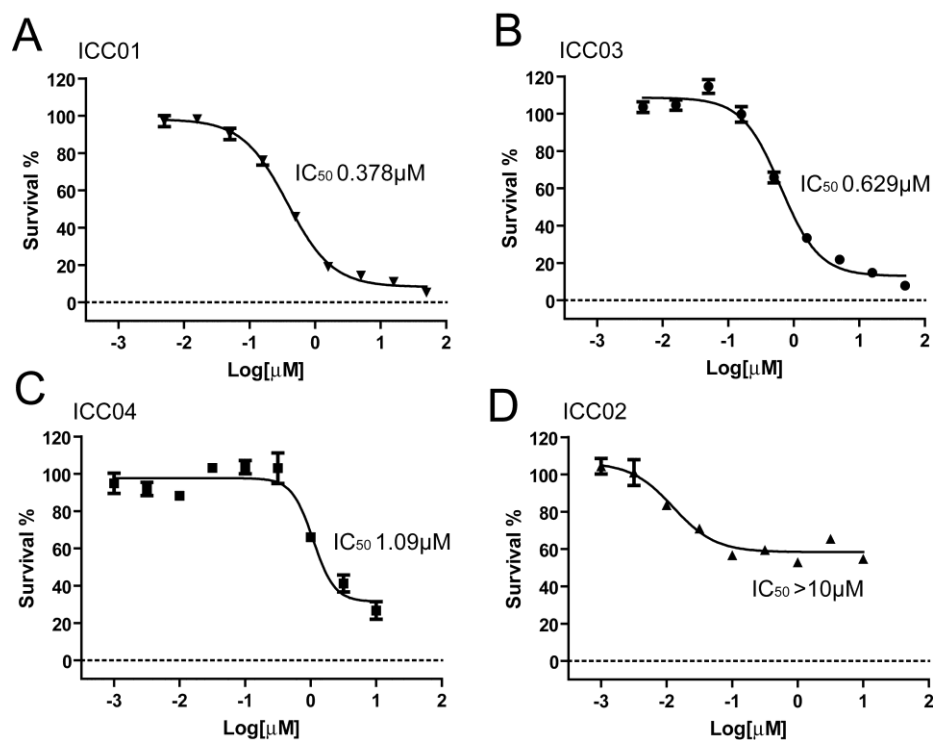

**Supplementary Figure S1: Efficacy of growth suppression of primary ICC cells by MLN4924.** Primary ICC cell lines were established as described in the Methods. Cells were seeded in 96-well plates in triplicates and treated with various concentrations of MLN4924 for 7 days, respectively. Cells were then lysed for ATPlite assay.  $N = 3 \pm SD$ .

**Supplementary Table S1:** Demographics and Clinicopathologic Features of Patients with Intrahepatic Cholangiocarcinoma

| <b>Variables</b>                     | <b>No.</b> | <b>%</b>   |
|--------------------------------------|------------|------------|
| Age: median (IQR), years             | 58.0       | 50.0-65.3  |
| Male gender:                         | 194        | 60.2       |
| CA19-9: median (IQR), U/ml           | 37.4       | 14.7-231.6 |
| Etiology:                            |            |            |
| HBV                                  | 124        | 38.5       |
| lithiasis                            | 8          | 2.5        |
| liver fluke                          | 11         | 3.4        |
| unknown                              | 179        | 55.6       |
| Liver cirrhosis                      | 86         | 26.7       |
| Tumor size: median (IQR), cm         | 6.0        | 4.0-8.0    |
| Tumor differentiation <sup>a</sup> : |            |            |
| well                                 | 16.5       | 16.5       |
| moderate                             | 62.4       | 62.4       |
| poor                                 | 21.1       | 21.1       |
| Lymph node metastasis                | 56         | 17.4       |
| Vascular invasion                    | 46         | 14.3       |
| Intrahepatic metastasis              | 78         | 24.2       |
| TNM stage <sup>b</sup> :             |            |            |
| I                                    | 167        | 51.9       |
| II                                   | 81         | 25.2       |
| III                                  | 16         | 5.0        |
| IVA                                  | 58         | 18.0       |
| Tumor recurrence                     | 184        | 57.1       |

Abbreviations: HBV, hepatitis B virus; TNM, tumor–node–metastasis; IQR,

interquartile range.

<sup>a</sup> Tumor differentiation was determined according to the "British Society of Gastroenterology guidelines on the management of cholangiocarcinoma".

<sup>b</sup> American Joint Committee on Cancer 7th edition staging for intrahepatic cholangiocarcinoma.

**Supplementary Table S2.** Univariable and Multivariable Analyses of Factors Associated with Time to Recurrence in 322 Intrahepatic Cholangiocarcinoma Patients

| Variables                                        | Univariable <sup>a</sup> |          | Multivariable <sup>b</sup> |          |
|--------------------------------------------------|--------------------------|----------|----------------------------|----------|
|                                                  | Hazard ratio<br>(95% CI) | <i>P</i> | Hazard ratio<br>(95% CI)   | <i>P</i> |
| Age: >58 v ≤58 (year)                            | 0.91 (0.68-1.22)         | .520     |                            | NA       |
| Gender: male v female                            | 1.05 (0.78-1.42)         | .737     |                            | NA       |
| CA19-9: >37 v ≤ 37 (U/ml)                        | 1.37 (1.01-1.85)         | .041     |                            | NS       |
| Liver cirrhosis: yes v no                        | 1.25 (0.91-1.73)         | .170     |                            | NA       |
| Tumor size: >5 v ≤5 (cm)                         | 1.33 (0.99-1.78)         | .059     |                            | NA       |
| Tumor differentiation:<br>poor v moderate v well | 0.99 (0.78-1.26)         | .955     |                            | NA       |
| Lymph node metastasis: yes v no                  | 2.56 (1.81-3.63)         | <.001    | 2.47 (1.72-3.55)           | <.001    |
| Vascular invasion: yes v no                      | 1.59 (1.10-2.31)         | .015     | 1.65 (1.12-2.43)           | .011     |

|                                   |                  |       |                  |      |
|-----------------------------------|------------------|-------|------------------|------|
| Intrahepatic metastasis: yes v no | 1.80 (1.31-2.47) | <.001 | 1.74 (1.25-2.43) | .001 |
| TNM stage: IVA+III v II+I         | 2.04 (1.47-2.81) | <.001 |                  | NS   |
| NEDD8: high v low                 | 1.59 (1.14-2.22) | .007  |                  | NS   |
| NAE1: high v low                  | 1.80 (1.26-2.57) | .001  | 1.62 (1.13-2.33) | .009 |
| UBA3: high v low                  | 1.15 (0.84-1.57) | .388  |                  | NA   |
| UBC12: high v low                 | 1.45 (1.03-2.04) | .034  |                  | NS   |

Abbreviations: TNM, tumor–node–metastasis; CI, confidence interval; NA, not applicable; NS, not significant.

<sup>a</sup> Cox proportional hazards regression.

<sup>b</sup> Cox proportional hazards regression analysis adjusting for CA19-9 level, lymph node metastasis, vascular invasion, intrahepatic metastasis and TNM stage, using stepwise selection.

**Supplementary Table S3.** Relationship of NEDD8, NAE1, UBA3 and UBC12 Expression with Clinicopathologic Features of ICC.

| Variables       | NEDD8 |      |          | NAE1 |      |          | UBA3 |      |              | UBC12 |      |          |
|-----------------|-------|------|----------|------|------|----------|------|------|--------------|-------|------|----------|
|                 | low   | high | <i>P</i> | low  | high | <i>P</i> | low  | high | <i>P</i>     | low   | high | <i>P</i> |
| Age             |       |      |          |      |      |          |      |      |              |       |      |          |
| ≤58 year        | 48    | 121  | 0.335    | 45   | 124  | 0.271    | 48   | 121  | 0.076        | 49    | 120  | 0.710    |
| >58 year        | 52    | 101  |          | 50   | 103  |          | 58   | 95   |              | 41    | 112  |          |
| Gender          |       |      |          |      |      |          |      |      |              |       |      |          |
| female          | 44    | 84   | 0.326    | 45   | 83   | 0.081    | 53   | 75   | <b>0.011</b> | 39    | 89   | 0.447    |
| male            | 56    | 138  |          | 50   | 144  |          | 53   | 141  |              | 51    | 143  |          |
| Liver cirrhosis |       |      |          |      |      |          |      |      |              |       |      |          |

|                         |    |     |              |    |     |              |    |     |       |    |     |              |
|-------------------------|----|-----|--------------|----|-----|--------------|----|-----|-------|----|-----|--------------|
| no                      | 77 | 159 | 0.343        | 74 | 162 | 0.270        | 79 | 157 | 0.789 | 66 | 170 | 1.00         |
| yes                     | 23 | 63  |              | 21 | 65  |              | 27 | 59  |       | 24 | 62  |              |
| Tumor size              |    |     |              |    |     |              |    |     |       |    |     |              |
| ≤5 cm                   | 47 | 98  | 0.717        | 38 | 107 | 0.270        | 49 | 96  | 0.812 | 41 | 104 | 1.00         |
| >5 cm                   | 53 | 124 |              | 57 | 120 |              | 57 | 120 |       | 49 | 128 |              |
| Tumor differentiation   |    |     |              |    |     |              |    |     |       |    |     |              |
| well                    | 20 | 33  | 0.181        | 20 | 33  | 0.107        | 24 | 29  | 0.049 | 19 | 34  | 0.063        |
| moderate                | 55 | 146 |              | 51 | 150 |              | 57 | 144 |       | 47 | 154 |              |
| poor                    | 25 | 43  |              | 24 | 44  |              | 25 | 43  |       | 24 | 44  |              |
| Lymph node metastasis   |    |     |              |    |     |              |    |     |       |    |     |              |
| no                      | 83 | 183 | 1.00         | 80 | 186 | 0.747        | 88 | 178 | 1.00  | 76 | 190 | 0.627        |
| yes                     | 17 | 39  |              | 15 | 41  |              | 18 | 38  |       | 14 | 42  |              |
| Vascular invasion       |    |     |              |    |     |              |    |     |       |    |     |              |
| no                      | 87 | 189 | 0.733        | 83 | 193 | 0.727        | 96 | 180 | 0.091 | 74 | 202 | 0.288        |
| yes                     | 13 | 33  |              | 12 | 34  |              | 10 | 36  |       | 16 | 30  |              |
| Intrahepatic metastasis |    |     |              |    |     |              |    |     |       |    |     |              |
| no                      | 79 | 165 | 0.401        | 76 | 168 | 0.318        | 86 | 158 | 0.129 | 72 | 172 | 0.312        |
| yes                     | 21 | 57  |              | 19 | 59  |              | 20 | 58  |       | 18 | 60  |              |
| TNM stage <sup>b</sup>  |    |     |              |    |     |              |    |     |       |    |     |              |
| I+ II                   | 74 | 174 | 0.394        | 72 | 176 | 0.772        | 80 | 168 | 0.673 | 70 | 178 | 0.884        |
| III+ IVA                | 26 | 48  |              | 23 | 51  |              | 26 | 48  |       | 20 | 54  |              |
| Recurrence              |    |     |              |    |     |              |    |     |       |    |     |              |
| no                      | 54 | 84  | <b>0.008</b> | 54 | 84  | <b>0.001</b> | 50 | 88  | 0.283 | 47 | 91  | <b>0.044</b> |
| yes                     | 46 | 138 |              | 41 | 143 |              | 56 | 128 |       | 43 | 141 |              |

---

Fisher's exact tests or Chi-square tests.

**Supplementary Table S4:** Multivariable Analyses of Factors Associated with Time to Recurrence in 322 Intrahepatic Cholangiocarcinoma Patients

| Variables                         | Multivariable <sup>a</sup> |          |
|-----------------------------------|----------------------------|----------|
|                                   | Hazard ratio (95% CI)      | <i>P</i> |
| CA19-9: >37 v ≤ 37 (U/ml)         |                            | NS       |
| Lymph node metastasis: yes v no   | 2.52 (1.76-3.63)           | <.001    |
| Vascular invasion: yes v no       | 1.69 (1.15-2.50)           | .008     |
| Intrahepatic metastasis: yes v no | 1.75 (1.25-2.44)           | .001     |
| TNM stage: IVA+III v II+I         |                            | NS       |
| NEDD8 and NAE1                    |                            |          |
| Overall                           |                            | .010     |
| Either high v both low            | 1.52 (0.90-2.56)           | .117     |
| Both high v both low              | 1.96 (1.25-3.05)           | .003     |
| NEDD8 and UBC12                   |                            |          |
|                                   |                            | NS       |

Abbreviations: TNM, tumor–node–metastasis; CI, confidence interval; NS, not significant.

<sup>a</sup> Cox proportional hazards regression analysis adjusting for CA19-9 level, lymph node metastasis, vascular invasion, intrahepatic metastasis and TNM stage, using stepwise selection.
